# Supplementary material for: Clinical and pathophysiologic aspects of ECMO-associated hemorrhagic complications
Source: PLoS One. 2020 Oct 13;15(10):e0240117. doi: 10.1371/journal.pone.0240117 (PMC7553268; doi:10.1371/journal.pone.0240117)
Supplement: S1 Data — (XLSX) [file pone.0240117.s001.xlsx]

## Sheet: Лист1
№	gender	age	weight			day	Scale SOFA	Source of bleeding	Severity of bleeding	Analysis execution time	ROTEM											АСТ								Heparin units / hour / kg								time	Coagulogram							time	Coagulogram
											Aptem				Intem			Extem			Fibtem
				type ECMO	Scale Apache 2						CT	CFT	MCF		CT	CFT	MCF	CT	CFT	MCF	CFT																		Antithrombin III, %	APTT, seconds (26-38)	international normalized relations	Quick prothrombin activity, %	Prothrombin time, sec	Thrombin time	Fibrinogen in plasma		Antithrombin III, %	APTT, seconds (26-38)	international normalized relations
1	man	40-65	80-100	v-v	23	1	6	2	2	09:00:00												09:00:00		14:00:00		20:00:00		02:00:00		09:00:00	1.52632	14:00:00	1.52632	20:00:00	1.52632	02:00:00	1.52632	09:00:00								16:00:00	30.5	74.7	1.99
2	woman	20-40	60-80	v-v	36	1	18			09:00:00												09:00:00		14:00:00		20:00:00		02:00:00		09:00:00		14:00:00		20:00:00		02:00:00		09:00:00								16:00:00
3	man	40-65	80-100	v-v	11	1	12			09:00:00												09:00:00		14:00:00		20:00:00		02:00:00		09:00:00	1	14:00:00	12	20:00:00	11	02:00:00	1	09:00:00								16:00:00
4	man	40-65	<60	v-v	21	1	16	2	2	09:00:00												09:00:00		14:00:00		20:00:00		02:00:00		09:00:00	14.8148	14:00:00	14.8148	20:00:00	14.8148	02:00:00	14.8148	09:00:00	99.9	102.2	1.13	79.5	13	нет	3.97	16:00:00		68.9	1.01
5	woman	20-40	80-100	v-v	19	1	12			09:00:00												09:00:00		14:00:00		20:00:00		02:00:00		09:00:00	16.6667	14:00:00	16.6667	20:00:00	16.6667	02:00:00	16.6667	09:00:00								16:00:00	81.1	34.1	1.38
6	woman	40-65	80-100	v-v	21	1	6			09:00:00												09:00:00		14:00:00		20:00:00		02:00:00		09:00:00		14:00:00		20:00:00		02:00:00		09:00:00								16:00:00	98.5	83.2	1.03
7	man	40-65	60-80	v-v	46	1	11			09:00:00	73	49	80		397	85	75	80	41	88	48	09:00:00		14:00:00		20:00:00		02:00:00		09:00:00	5.71429	14:00:00	7.14286	20:00:00	7.14286	02:00:00	7.14286	09:00:00		46.4	1.41	57.4	15.9	22.4		16:00:00	91.7	108.7	1.53
8	man	40-65	80-100	v-v	22	1	10	2	2	09:00:00												09:00:00		14:00:00		20:00:00		02:00:00		09:00:00	2.15263	14:00:00	2.15263	20:00:00	2.15263	02:00:00	2.15263	09:00:00		56	1.41	57.1	15.9			16:00:00	81.3	134.6	1.96
9	man	40-65	80-100	v-v	38	1	8			09:00:00	73	101	61		142	92	17	76	103	61	17	09:00:00	135	14:00:00	142	20:00:00	133	02:00:00	128	09:00:00	5.26316	14:00:00	5.78947	20:00:00	5.26316	02:00:00	5.26316	09:00:00	91.6	35.3	1.28	66.1	14.5	16.6	3.466	16:00:00		34.7	1.25
10	man	>65	60-80	а-v	32	1	10	2	2	09:00:00	1680	602	63		163	46	66	673	138	59		09:00:00		14:00:00		20:00:00		02:00:00		09:00:00	4.61538	14:00:00	4.61538	20:00:00	4.61538	02:00:00	4.61538	09:00:00		51.8	1.84	39.7	20.3			16:00:00
11	woman	40-65	60-80	v-а	26	1	14	1	2	09:00:00	61	65	66		211	98	58	78	112	58		09:00:00		14:00:00		20:00:00		02:00:00		09:00:00	4.61538	14:00:00	4.61538	20:00:00	3.76924	02:00:00	4.61538	09:00:00								16:00:00		нет	4.17
12	man	40-65	60-80	v-v	19	1	8	1	3	09:00:00	90	66	72		195	65	74	158	61	77	144	09:00:00		14:00:00		20:00:00		02:00:00		09:00:00	9.23769	14:00:00	9.23769	20:00:00	15.3846	02:00:00	15.3846	09:00:00		45.2	1.4	57.9	15.8			16:00:00
13	man	20-40	80-100	v-v	48	1		1	3	09:00:00												09:00:00		14:00:00		20:00:00		02:00:00		09:00:00		14:00:00		20:00:00		02:00:00		09:00:00								16:00:00		45.9	1.61
14	man	>65	80-100	v-v	18	1	6	1.5	2	09:00:00	61	96	62		359	140	58	74	88	63		09:00:00	134	14:00:00	155	20:00:00	123	02:00:00	144	09:00:00	12.1951	14:00:00	1.9757	20:00:00	9.75698	02:00:00	1.9757	09:00:00								16:00:00	82.5	нет	2.26
15	woman	40-65	<60	v-a	37	1	10			09:00:00												09:00:00		14:00:00		20:00:00		02:00:00		09:00:00		14:00:00		20:00:00		02:00:00		09:00:00								16:00:00
16	woman	20-40	75	v-a	24	1	10	1,4,6	3	09:00:00	88	135	58		306	120	58	83	118	60	1309	09:00:00		14:00:00	127	20:00:00	112	02:00:00	102	09:00:00	13.3333	14:00:00	13.3333	20:00:00	6.66667	02:00:00	6.66667	09:00:00		77.5	1.31	64.1	14.8			16:00:00	78.2	нет	1.33
17	man	>65	100-120	v-a	30	1	18	1	2	09:00:00												09:00:00		14:00:00		20:00:00		02:00:00		09:00:00	5.7	14:00:00	6.1	20:00:00	6.1	02:00:00	5.7	09:00:00								16:00:00	35.5	134.4	2.11
18	man	40-65	80-100	v-v	36	1	18	1	2	09:00:00	121	122	59		280	120	57	143	108	60	18	09:00:00		14:00:00		20:00:00		02:00:00		09:00:00		14:00:00		20:00:00		02:00:00		09:00:00	42.7	нет	3.16	20.2	33.3		4.06	16:00:00		70.1	2.92
19	man	20-40	100-120	v-v	14	1	11			09:00:00	104	70	72		140	57	73	92	61	74	65	09:00:00		14:00:00		20:00:00	111	02:00:00	113	09:00:00	3.33333	14:00:00	4.16667	20:00:00	4.16667	02:00:00	4.16667	09:00:00								16:00:00
20	man	40-65	110	v-v	21	1	6	1	2	09:00:00	79	123	48		134	96	48	91	92	49	122	09:00:00		14:00:00		20:00:00		02:00:00		09:00:00	2.72727	14:00:00	1.81818	20:00:00	0	02:00:00	1	09:00:00	87.7	29.9	1.18		13.5		4.898	16:00:00		27.9	1.18
21	man	40-65	60-80	v-a	48	1	14	4	3	09:00:00	228	863	27		298	668	30	121	590	31		09:00:00		14:00:00	180	20:00:00	176	02:00:00	178	09:00:00	0	14:00:00	0	20:00:00	0	02:00:00	0	09:00:00	0.12	59.7	2.8	22.8	30		нет	16:00:00		69.8	3.54
22	woman	40-65	60-80	v-a	38	1	12	4,6	2	09:00:00	129	163	56		233	172	54	122	142	59		09:00:00		14:00:00		20:00:00		02:00:00		09:00:00	0	14:00:00	0	20:00:00	0	02:00:00	0	09:00:00		no reaction	2.46	27.6	26.5		4.344	16:00:00	12.6	90.3	3.07
23	woman	20-40	<60	v-v	22	1	6	0	0	09:00:00	66	69	74		159	51	70	96	62	70	52	09:00:00		14:00:00		20:00:00		02:00:00		09:00:00	0	14:00:00	0	20:00:00	0	02:00:00	0	09:00:00	78.3	51	0.96	104.6	11.1		2.49	16:00:00	81.7	46.7	0.96
24	man	40-65	60-80	V-a	20	1	10	0	0	09:00:00	209	88	60		201	87	59	94	100	65															1000		800											26.1	0.95
25	man	20-40	60-80	v-a	24	1	11	0	0	09:00:00	137	102	59		212	89	57	120	101	59							174						300		375		250										90.2	49.4	1.1
26	woman	20-40	60-80	v-v	21	1	9	0	0	09:00:00	152	143	53		166	140	54	89	108	60											800		600		600		1200		63.3	32.5	1.38	59.7	15.5		2.98			34.3	1.15
27	woman	40-65	<60	v-v	15	1	7	1	2	09:00:00	117	67	72		217	65	72	107	64	72	139										500		900		1200		1000		70.9	77	1.4	57.9	15.8		3.832			68.1	1.31
Severity of bleeding
1
2
3
4
Source of bleeding
1
2
3
4
5
6
7
8
9
10
11
[truncated: 1,682 more columns]
